# Supplementary material
Source: publisher figshare collection journal article supplement (https://acs.figshare.com/ndownloader/files/4246657)
Supplement: Supplementary file 1 [file 4246657]

## Supplementary Information for

### Self assembled liquid crystal polymers on photo-irradiated alignment surfaces for tailoring response properties of liquid crystal molecules

Jung Y. Huang and Liu S. Li

Department of Photonics and Institute of Electro-Optical Engineering,  
Chiao Tung University  
Hsinchu, Taiwan, R.O.C.

**S.1 Calibration of sum-frequency vibrational spectrum.** We acquired the reflected sum-frequency (sf) spectra from a sample with *ssp* and *ppp* polarization combinations, where the letters indicate the polarizations of the sf, visible, and ir beams, respectively. All spectra were calibrated to the *ssp* signal from a z-cut LiNbO<sub>3</sub> at the same condition. The sum-frequency reference field is proportional to an effective second-order nonlinear optical susceptibility of

$$c_{eff}^{(2)} = c_{xzx}^{(2)} \sin q \cos^2 f + c_{yyy}^{(2)} \cos q (\sin^2 f - 2 \cos^2 f \sin f) . \quad (S-1)$$

Here  $f$  is the azimuthal angle between the incident plane and the x-axis of LiNbO<sub>3</sub>.

By examining the azimuthal pattern, we can fix the z-cut LiNbO<sub>3</sub> crystal at  $f = p/2$

to yield  $c_{eff}^{(2)} = 2 \times 10^{-12} \text{ m/V}$  with an incident angle of  $q = p/4$ . The sum-frequency

reference field is generated by a surface layer with a thickness of coherence length. In

a reflective geometry, the coherence length  $d = p/(k_{vis,z} + k_{ir,z} + k_{sf,z})$  is estimated

to be  $50 \text{ nm}$ . The resulting second-order nonlinear optical polarization

$$P_{sf}^{(2)} = e_0 [c_{eff}^{(2)} d] E_{vis} E_{ir} = e_0 c_s^{(2)} E_{vis} E_{ir} = \epsilon_s^{(2)} E_{vis} E_{ir} \text{ serves as the radiation source}$$

for the observed sum-frequency reference signal  $I_{sf}/(I_{vis} I_{ir}) \propto |\epsilon_s^{(2)}|^2$ , which can be

conveniently expressed as  $|\epsilon_s^{(2)}(\text{LiNbO}_3)|^2 = 8000 \times 10^{-64} \text{ m}^2 \text{C}^2 / \text{V}^4 \text{ Å}^2$ .

For the measured SFVS spectra shown in Fig. 6(b), we found the signal at

$1515 \text{ cm}^{-1}$  from the 90-nm thick LCP film to be about 1/30 of the reference signal. The SFVS spectra can be calibrated and presented in the unit of  $10^{-64} \text{ m}^2 \text{C}^2 / \text{V}^4$ , which are shown in Fig. S1.

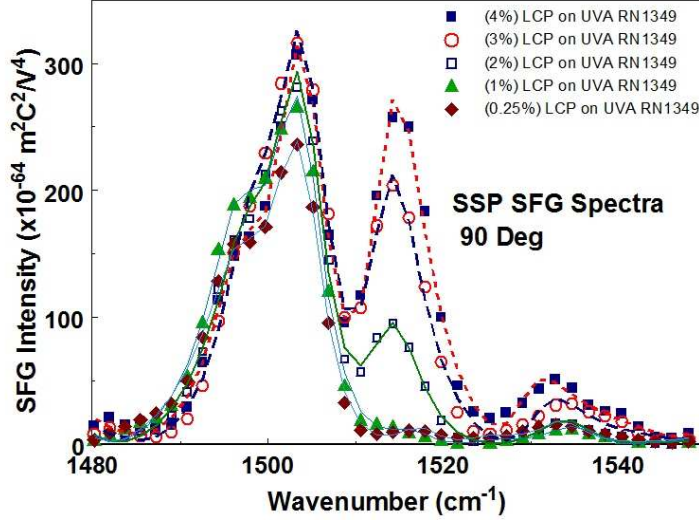

FIG. S1: Calibrated *ssp* SFVS spectra of LCP films spin coated with 0.25%, 1%, 2%, 3% and 4% LCP solutions. The polarization of the LPUV light  $E_{UV}$  was oriented at  $90^\circ$  relative to the incident plane of SFVS measurement.

We noticed that Masahito Oh-e, *et al.* had studied PMDA-ODA (poly[4,4'-oxydiphenylenepyromellitimide]) with SFVS and found the phenylene skeleton C–C stretch of the film at  $1515 \text{ cm}^{-1}$  yielding an intensity of

$$3.8 \times 10^{-42} \text{ m}^4 / \text{V}^2 \quad ( : \quad 3 \times 10^{-64} \text{ C}^2 \text{m}^2 / \text{V}^4 ).^{S1}$$

For an isotropic medium such as PMDA-ODA, the SFVS signal shall originate from the surface polar layer, whose thickness was estimated to be about 5 nm. Assuming the packing density of phenyl ring is similar in PMDA-ODA and LCP, a 45-nm thick LCP layer with a polar structure can produce a SFVS intensity of  $240 \times 10^{-64} \text{ C}^2 \text{m}^2 / \text{V}^4$  in a reflection geometry. The layer thickness needed is about one coherence length in a reflection geometry. This result supports the concept that the LCP is grown epitaxially to form a uniaxial structure, which yields an intense SFVS signal from the bulk.

**S.2 Calculation of the vibrations of the biphenyl carbonate moiety.** The calculation was

carried out with a DMol3 software package, which can model the electronic structure and energetics of molecules using density functional theory (DFT). The DFT calculation was implemented with the Perdew-Wang (PW91) generalized gradient approximation (GGA) in a double numerical plus polarization (DNP) basis set. The SCF convergence quality was better than  $1 \times 10^{-6}$ .

We first optimized the geometry of biphenyl carbonate moiety to an SCF convergence of energy  $\leq 10^{-5}$  Ha, force  $\leq 0.002$  Ha/Å, and displacement  $\leq 0.005$  Å. The optimized structure reveals that the two phenyl rings connected to the carbonate group are in a trans configuration. The result of vibrational analysis is summarized in Table S1, which presents the normal modes relevant to the core segment with frequencies lying between 1400-1800 $\text{cm}^{-1}$  and IR strength larger than 30 km/mol. The ring stretching modes with frequency below 1500  $\text{cm}^{-1}$  are antisymmetric with IR transition moments perpendicular to the molecular long axis. Between 1500-1600  $\text{cm}^{-1}$ , there are two symmetric ring distortions, which are mixed with C-H wag, with IR transition moments parallel to the molecular long axis. Other normal modes with purer symmetric stretch characteristics have vibrational frequencies higher than 1600  $\text{cm}^{-1}$ . For SFVS study, we focused on the two symmetric ring distortions between 1500-1600  $\text{cm}^{-1}$  in viewing that these two modes not only have an IR transition moment parallel to the molecular long axis, but also possess the character of C-H wags, which may produce significant dynamic dipoles and Raman tensors to yield intense sum frequency generation-active vibrations.

**Table S1:** Summary of the Vibrational Analysis of biphenyl carbonate moiety

| Frequency | IR | Comment | Mode Pattern |
|-----------|----|---------|--------------|
|-----------|----|---------|--------------|

| (cm <sup>-1</sup> ) | Strength<br>(km/mol) |                  |                                                                                                           |
|---------------------|----------------------|------------------|-----------------------------------------------------------------------------------------------------------|
| 1436                | 45                   | AntiSym. $\perp$ | <br>1436cm-1 mode.wmv  |
| 1440                | 32                   | AntiSym. $\perp$ | <br>1440cm-1 mode.wmv  |
| 1503                | 128                  | Sym. $\parallel$ | <br>1503cm-1 mode.wmv  |
| 1512                | 94                   | Sym. $\parallel$ | <br>1512cm-1 mode.wmv  |
| 1615                | 188                  | Sym. $\parallel$ | <br>1615cm-1 mode.wmv  |
| 1618                | 31                   | Sym. $\parallel$ | <br>1618cm-1 mode.wmv  |
| 1735                | 235                  | C=O              | <br>1735cm-1 mode.wmv |

### Supplementary References

- S1. Oh-e, M.; Kim, D.; Shen, Y. R. *J. Chem. Phys.* **2001**, 115, 5582-5588.
